# Supplementary material
Source: PubMed Central journal article supplement (PMC7540724)
Supplement: NIHMS1560190-supplement-1.pdf [file NIHMS1560190-supplement-1.pdf]

**Supplementary Table 1 | Data collection and refinement statistics**

|                                                     | <i>T. thermophilus</i><br>Wild-type RodA:PBP2<br>complex <sup>‡</sup> | <i>T. thermophilus</i><br>RodA (D255A):PBP2<br>complex <sup>‡</sup> |
|-----------------------------------------------------|-----------------------------------------------------------------------|---------------------------------------------------------------------|
| <b>Data collection</b>                              |                                                                       |                                                                     |
| Space group                                         | <i>P</i> 3 <sub>2</sub> 21                                            | <i>P</i> 3 <sub>2</sub> 21                                          |
| Cell dimensions                                     |                                                                       |                                                                     |
| <i>a</i> , <i>b</i> , <i>c</i> (Å)                  | 119.6, 119.6, 267.3                                                   | 118.44, 118.44 265.80                                               |
| $\alpha$ , $\beta$ , $\gamma$ (°)                   | 90, 90, 120                                                           | 90, 90, 120                                                         |
| Resolution (Å)                                      | 50.0–3.5 (3.6–3.5)*                                                   | 50.0–3.3 (3.4–3.3)*                                                 |
| <i>R</i> <sub>merge</sub>                           | 15.9 (269.0)                                                          | 24.3 (339.3)                                                        |
| <i>I</i> / $\sigma$ <i>I</i>                        | 8.15 (0.62)                                                           | 5.86 (0.58)                                                         |
| Completeness (%)                                    | 99.3 (99.8)                                                           | 99.8 (99.7)                                                         |
| Redundancy                                          | 6.11 (6.11)                                                           | 6.77 (6.82)                                                         |
| CC <sub>1/2</sub> (%)                               | 99.9 (33.4)                                                           | 99.9 (33.0)                                                         |
| <b>Refinement</b>                                   |                                                                       |                                                                     |
| Resolution (Å)                                      | 50.0–3.50 (3.55–3.50)                                                 | 50.0–3.30 (3.34–3.30)                                               |
| No. reflections                                     | 50777 (1761)                                                          | 59327 (1320)                                                        |
| <i>R</i> <sub>work</sub> / <i>R</i> <sub>free</sub> | 28.7 / 30.5                                                           | 27.7 / 30.8                                                         |
| No. atoms                                           |                                                                       |                                                                     |
| Protein                                             | 6843                                                                  | 6864                                                                |
| Ligand/ion                                          | -                                                                     | 24                                                                  |
| <i>B</i> -factors                                   |                                                                       |                                                                     |
| Protein                                             | 175.8                                                                 | 156.9                                                               |
| Ligand/ion                                          | -                                                                     | 168.9                                                               |
| R.m.s. deviations                                   |                                                                       |                                                                     |
| Bond lengths (Å)                                    | 0.002                                                                 | 0.002                                                               |
| Bond angles (°)                                     | 0.494                                                                 | 0.463                                                               |

<sup>‡</sup> Data shown are derived from 2 and 5 crystals for the wild-type protein and 5 crystals for the D255A variant. \*Values in parentheses are for highest-resolution shell.

**Supplementary Table 2 | Plasmids and *E. coli* strains used in this study**

| Plasmid        | Description/Genotype                                                                            | origin | Source/<br>Reference |
|----------------|-------------------------------------------------------------------------------------------------|--------|----------------------|
| <b>pAM174</b>  | <i>p<sub>BAD</sub>-His6-Ulp1(403–621)</i>                                                       | p15A   | 1                    |
| <b>pMS211</b>  | <i>p<sub>T7</sub>-His6-SUMO-Flag-3C-TtRodA</i>                                                  | ColE1  | 13                   |
| <b>pMS235</b>  | <i>p<sub>T7</sub>-TtPBP2-3C-PrtC</i>                                                            | ColA   | this study           |
| <b>pMS239</b>  | <i>p<sub>T7</sub>-TtPBP2-3C-PrtC; p<sub>T7</sub>-His6-SUMO-Flag-3C-TtRodA</i>                   | ColA   | this study           |
| <b>pMS244</b>  | <i>p<sub>T7</sub>-TtPBP2-3C-PrtC; p<sub>T7</sub>-His6-SUMO-Flag-3C-TtRodA(D255A)</i>            | ColA   | this study           |
| <b>pMS292</b>  | <i>p<sub>T7</sub>-TtPBP2(L43R)-3C-PrtC; p<sub>T7</sub>-His6-SUMO-Flag-3C-TtRodA</i>             | ColA   | this study           |
| <b>pMS293</b>  | <i>p<sub>T7</sub>-TtPBP2(A186R)-3C-PrtC; p<sub>T7</sub>-His6-SUMO-Flag-3C-TtRodA</i>            | ColA   | this study           |
| <b>pMS294</b>  | <i>p<sub>T7</sub>-TtPBP2(R149-GlySer-E162)-3C-PrtC; p<sub>T7</sub>-His6-SUMO-Flag-3C-TtRodA</i> | ColA   | this study           |
| <b>pMW1010</b> | <i>p<sub>T7</sub>-His6-EfPBPX(T32-P429)</i>                                                     | ColE1  | 24                   |
| <b>pRY47</b>   | <i>cat P<sub>lac</sub>::empty</i>                                                               | ColE1  | 20                   |
| <b>pHC857</b>  | <i>cat P<sub>lac</sub>::pbpA-rodA</i>                                                           | ColE1  | 20                   |
| <b>pPR148</b>  | <i>cat P<sub>lac</sub>::pbpA(A147C)-rodA</i>                                                    | ColE1  | this study           |
| <b>pPR151</b>  | <i>cat P<sub>lac</sub>::pbpA(R237C)-rodA</i>                                                    | ColE1  | this study           |
| <b>pPR152</b>  | <i>cat P<sub>lac</sub>::pbpA(A147C/R237C)-rodA</i>                                              | ColE1  | this study           |
| <b>pPR190</b>  | <i>cat P<sub>lac</sub>::pbpA(L61R/A147C/R237C)-rodA</i>                                         | ColE1  | this study           |
| <b>FB38</b>    | <i>rph1 ilvG rfb-50 ΔlacIZYA::frt mrdAB::aph</i>                                                |        | 37                   |
| <b>TB28</b>    | <i>rph1 ilvG rfb-50 ΔlacIZYA::frt</i>                                                           |        | 40                   |

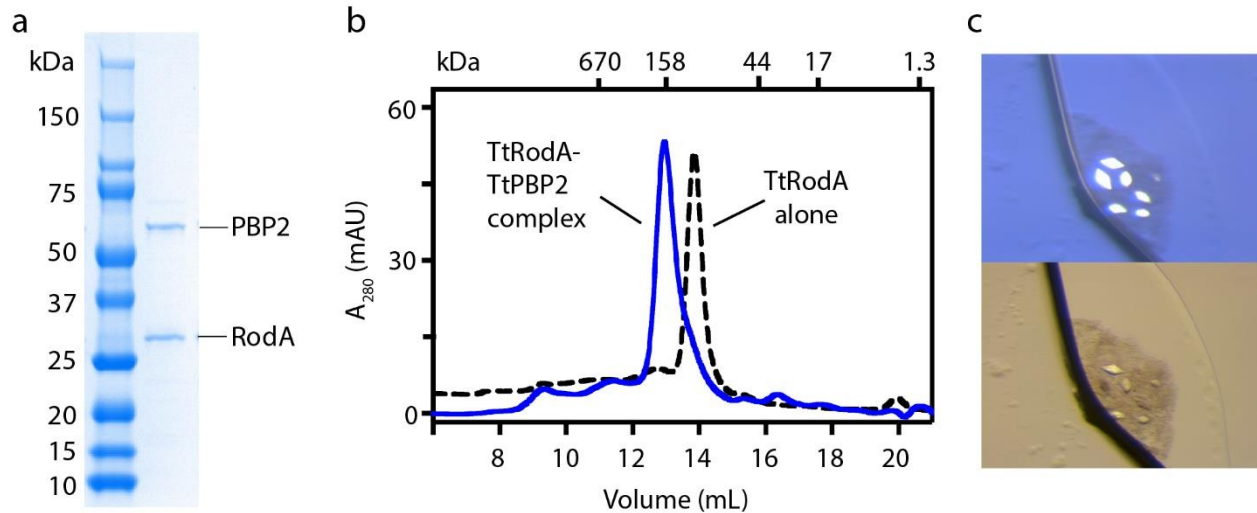

**Supplementary Figure 1 | Lipid cubic phase crystallography of *T. thermophilus* RodA-PBP2 complex.** **a**, Coomassie-stained gel of purified <sup>Tt</sup>RodA and <sup>Tt</sup>PBP2. **b**, Analytical SEC trace of <sup>Tt</sup>RodA-PBP2 complex. For comparison, the SEC trace of <sup>Tt</sup>RodA alone is shown. Estimated molecular weights are shown at the top based on the elution profiles of a set of standards. The molecular weight is consistent with expected size of the detergent-solubilized (DDM) proteins. Results in **a** and **b** are representative of more than 3 experiments. **c**, Representative crystals of TtRodA-PBP2 complex.

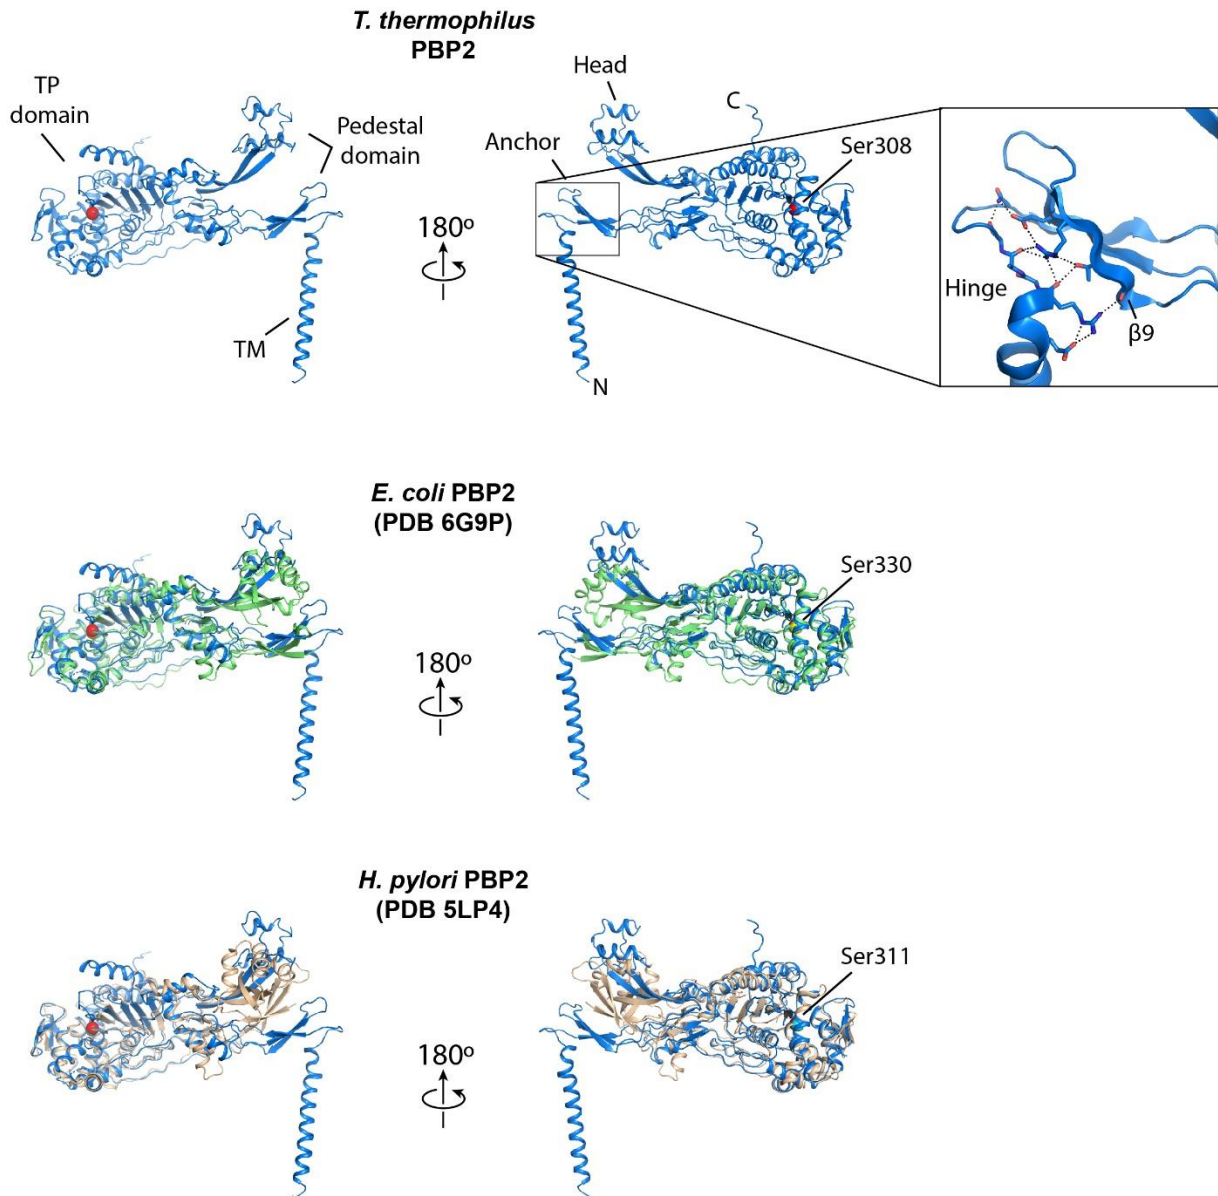

**Supplementary Figure 2 | *T. thermophilus* PBP2 is structurally similar to PBP2 of *E. coli* and *H. pylori*.** *T. thermophilus* PBP2 is shown as ribbons colored blue and aligned to the previously determined structures of PBP2 from *E. coli* (green), *H. pylori* (tan). The catalytic serine of each homolog is shown as a red sphere. The inset in the top panel highlights the network of hydrogen bonds and salt bridges formed between the hinge region and the anchor subdomain in *T. thermophilus* PBP2.

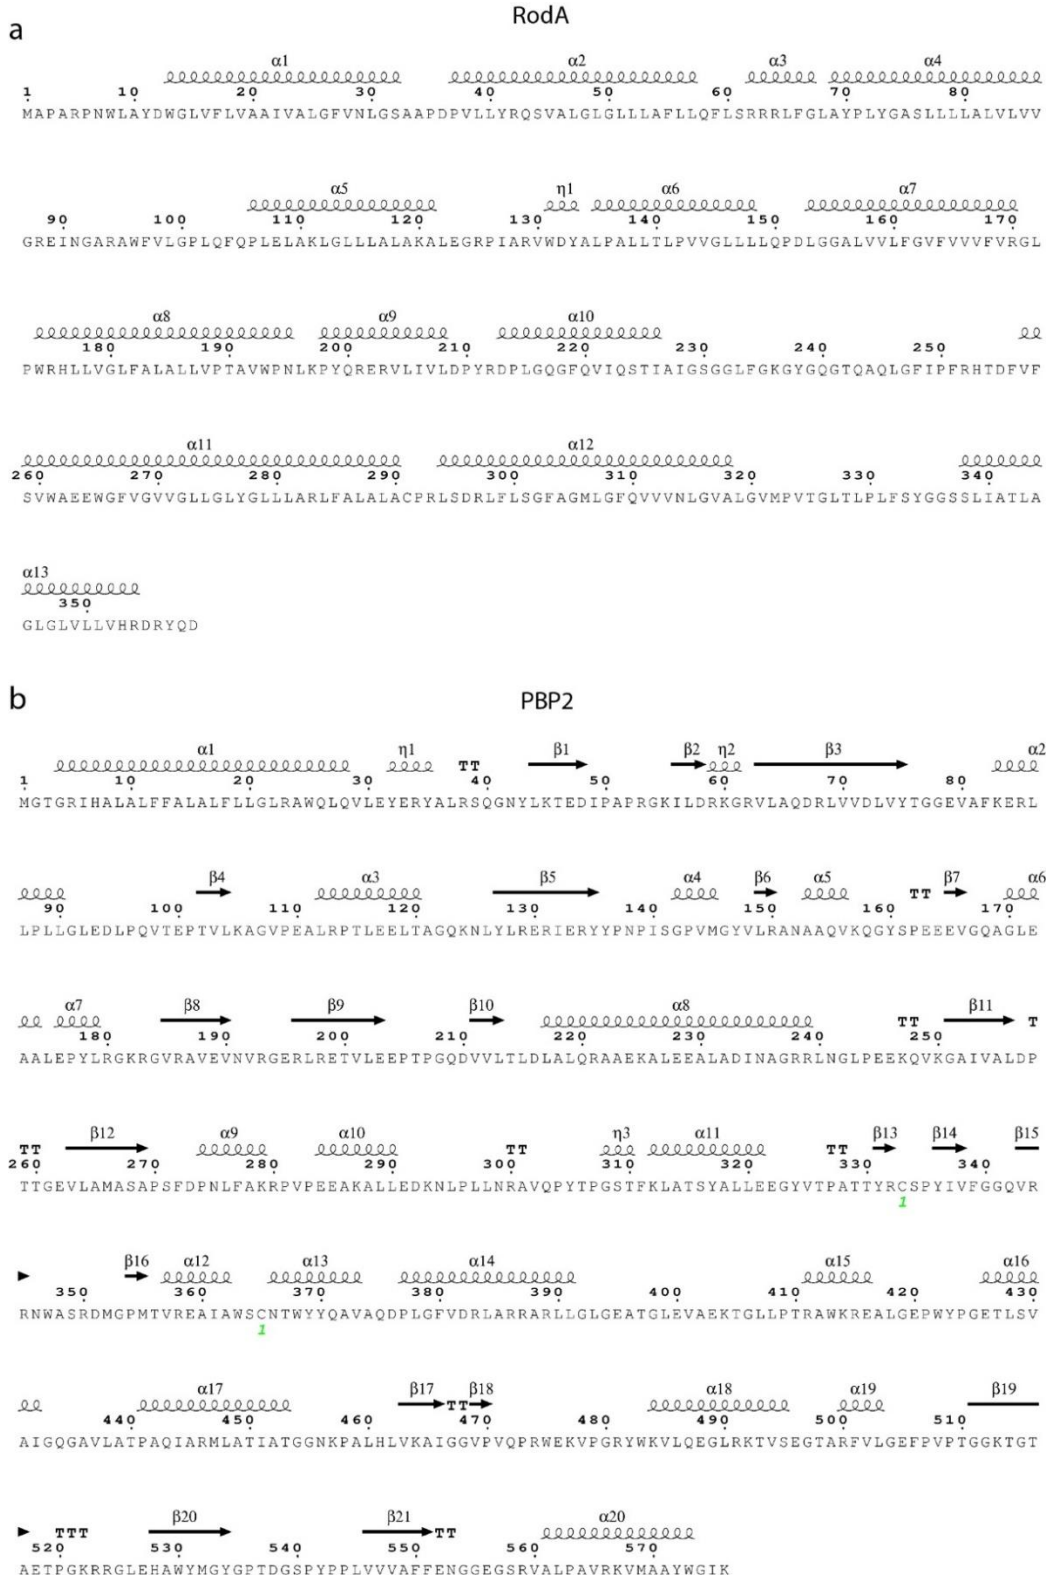

**Supplementary Figure 3 |** The secondary structure features of *T. thermophilus* **a**, RodA and **b**, PBP2 are annotated above the amino-acid sequence of each.
